# Supplementary material
Source: PubMed Central journal article supplement (PMC11028441)
Supplement: 262_2015_1712_MOESM1_ESM.pdf [file 262_2015_1712_MOESM1_ESM.pdf]

**Supplementary Table 1** Differentially expressed (DE) genes (n=79) in the comparison between MUC1-Tg mice receiving anti-PDL1 and rat IgG (3 doses, bi-weekly)

| <b>Genes</b> | <b>lfc<sup>a,b</sup> (PD-L1/IgG)</b> | <b>p value<sup>b</sup></b> | <b>q value<sup>b</sup></b> |
|--------------|--------------------------------------|----------------------------|----------------------------|
| Fnl          | -2.046974575                         | 0.0000                     | 0.04                       |
| Bst1         | -1.845037194                         | 0.0000                     | 0.04                       |
| Il1r2        | -1.74427792                          | 0.0000                     | 0.04                       |
| Fkbp5        | -1.15630432                          | 0.0000                     | 0.04                       |
| Tfrc         | -1.090664073                         | 0.0000                     | 0.04                       |
| Icam4        | -1.268640768                         | 0.0000                     | 0.05                       |
| Marco        | -1.323717811                         | 0.0000                     | 0.05                       |
| Ifitm1       | -1.299836153                         | 0.0000                     | 0.05                       |
| Cxcr2        | -1.264654671                         | 0.0000                     | 0.05                       |
| Card9        | -1.318249112                         | 0.0000                     | 0.05                       |
| App          | -1.082571273                         | 0.0000                     | 0.05                       |
| Tal1         | -1.211657681                         | 0.0000                     | 0.05                       |
| Abcb10       | -0.874191991                         | 0.0000                     | 0.06                       |
| Itgam        | -1.139298812                         | 0.0000                     | 0.06                       |
| Csf2rb       | -0.764665139                         | 0.0000                     | 0.06                       |
| Fcgr3        | -0.927278192                         | 0.0000                     | 0.08                       |
| Il18rap      | -0.678043539                         | 0.0000                     | 0.08                       |
| Lilrb3       | -0.753196193                         | 0.0000                     | 0.08                       |
| Ncam1        | -1.378910754                         | 0.0100                     | 0.08                       |
| Tirap        | -0.529193679                         | 0.0100                     | 0.08                       |
| Tgfb1        | -1.578060218                         | 0.0100                     | 0.08                       |
| C3           | -1.237743375                         | 0.0100                     | 0.09                       |
| Ltb4r1       | -1.313138581                         | 0.0100                     | 0.09                       |
| Il13ra1      | -1.021445824                         | 0.0100                     | 0.09                       |
| Ccl9         | -0.716440748                         | 0.0100                     | 0.09                       |
| Cfh          | -1.00593644                          | 0.0100                     | 0.09                       |
| Nfil3        | -0.768288735                         | 0.0100                     | 0.1                        |
| Tlr8         | -0.734143561                         | 0.0100                     | 0.1                        |
| Ctsg         | -1.910911628                         | 0.0100                     | 0.1                        |
| Ltbr         | -0.799527059                         | 0.0100                     | 0.1                        |
| Ccr2         | -0.68170139                          | 0.0100                     | 0.1                        |
| Clec5a       | -1.559141406                         | 0.0100                     | 0.1                        |
| Fcer1g       | -0.500595767                         | 0.0100                     | 0.11                       |
| Cd24a        | -0.285166693                         | 0.0100                     | 0.11                       |
| Litaf        | -0.562596922                         | 0.0100                     | 0.12                       |
| Cd34         | -1.288707654                         | 0.0100                     | 0.12                       |
| Ceacam1      | -0.468580903                         | 0.0200                     | 0.13                       |
| Trem1        | -0.999370039                         | 0.0200                     | 0.13                       |
| Hlx          | -0.711561271                         | 0.0200                     | 0.13                       |
| Plaur        | -0.159309249                         | 0.0200                     | 0.13                       |
| Socs3        | -0.415391715                         | 0.0200                     | 0.14                       |
| Cxcr6        | 2.579130943                          | 0.0000                     | 0.04                       |
| Cd3d         | 2.036329444                          | 0.0000                     | 0.04                       |

| <b>Genes</b> | <b>lfc <sup>a,b</sup> (PD-L1/IgG)</b> | <b>p value <sup>b</sup></b> | <b>q value <sup>b</sup></b> |
|--------------|---------------------------------------|-----------------------------|-----------------------------|
| Gzma         | 2.683702686                           | 0.0000                      | 0.04                        |
| Ccl5         | 2.042176015                           | 0.0000                      | 0.04                        |
| Sh2d1a       | 2.156534368                           | 0.0000                      | 0.04                        |
| Tcf7         | 2.028407776                           | 0.0000                      | 0.04                        |
| Lck          | 1.701120332                           | 0.0000                      | 0.05                        |
| Ccr7         | 1.8422903                             | 0.0000                      | 0.05                        |
| Cd8b1        | 3.923764907                           | 0.0000                      | 0.05                        |
| Cd3e         | 1.844788759                           | 0.0000                      | 0.05                        |
| Thy1         | 1.936760899                           | 0.0000                      | 0.06                        |
| Cd8a         | 1.968292738                           | 0.0000                      | 0.08                        |
| Tnfrsf13c    | 1.746390686                           | 0.0000                      | 0.08                        |
| Cd83         | 1.410641939                           | 0.0000                      | 0.08                        |
| Cd27         | 1.628021632                           | 0.0100                      | 0.08                        |
| Cd5          | 1.62282901                            | 0.0100                      | 0.08                        |
| Cd6          | 1.65196813                            | 0.0100                      | 0.09                        |
| Lef1         | 2.001314066                           | 0.0100                      | 0.09                        |
| Il27ra       | 1.570341625                           | 0.0100                      | 0.09                        |
| Folr4        | 1.632641946                           | 0.0100                      | 0.09                        |
| Cd2          | 1.454119806                           | 0.0100                      | 0.09                        |
| Nt5e         | 1.62454283                            | 0.0100                      | 0.09                        |
| Icos         | 1.596713567                           | 0.0100                      | 0.09                        |
| Cd247        | 1.598357544                           | 0.0100                      | 0.09                        |
| Klrd1        | 1.569598672                           | 0.0100                      | 0.1                         |
| Xcl1         | 1.5740809                             | 0.0100                      | 0.1                         |
| Bst2         | 1.390979019                           | 0.0100                      | 0.1                         |
| Cd79b        | 1.543251862                           | 0.0100                      | 0.1                         |
| Klrk1        | 1.508398622                           | 0.0100                      | 0.1                         |
| Fyn          | 1.251284852                           | 0.0100                      | 0.11                        |
| Tnfrsf4      | 1.684553646                           | 0.0100                      | 0.11                        |
| Cd40         | 1.318292995                           | 0.0100                      | 0.11                        |
| Cd226        | 1.484781607                           | 0.0200                      | 0.12                        |
| Slamf1       | 1.477460083                           | 0.0200                      | 0.12                        |
| Il2rb        | 1.297741658                           | 0.0200                      | 0.13                        |
| Stat1        | 1.272686962                           | 0.0200                      | 0.13                        |
| Prfl         | 2.69615605                            | 0.0200                      | 0.13                        |
| Ccr6         | 1.26768595                            | 0.0200                      | 0.14                        |

<sup>a</sup> log fold change, lfc

<sup>b</sup> The 79 DE genes were sorted by directionality, p value and finally q value.

Negative lfc values signify genes downregulated and positive lfc denote genes upregulated in PD-L1 treated mice.

**Supplementary Table 2** Differentially expressed genes (n=59) in the comparison between wild type (WT) mice receiving weekly anti-PDL1 + IFN $\alpha$  (n=4) and rat IgG (controls, n=4)

| <b>Genes</b> | <b>lfc<sup>a</sup> (anti-PD-L1+IFN<math>\alpha</math>/IgG)</b> | <b>p<sup>b</sup> value</b> | <b>q<sup>b</sup> value</b> |
|--------------|----------------------------------------------------------------|----------------------------|----------------------------|
| Ppbbp        | -2.758011536                                                   | 0.000809859                | 0.113955908                |
| Ctsg         | -3.161905469                                                   | 0.001588518                | 0.113955908                |
| Cd14         | -1.400283305                                                   | 0.001725154                | 0.113955908                |
| Clu          | -2.615592173                                                   | 0.001757661                | 0.113955908                |
| Cxcl12       | -3.070026088                                                   | 0.00194637                 | 0.113955908                |
| Ltb4r1       | -1.726353813                                                   | 0.002369092                | 0.113955908                |
| Clec5a       | -1.864852796                                                   | 0.002618862                | 0.113955908                |
| Ifitm1       | -1.563013868                                                   | 0.002821524                | 0.113955908                |
| Bst1         | -1.606048517                                                   | 0.002958401                | 0.113955908                |
| Trem1        | -1.937323148                                                   | 0.003316109                | 0.118274539                |
| App          | -1.147904093                                                   | 0.003886092                | 0.125410349                |
| Fn1          | -1.132548157                                                   | 0.004211334                | 0.125410349                |
| S100a9       | -1.523476648                                                   | 0.004325884                | 0.125410349                |
| Tfrc         | -0.725922818                                                   | 0.005137774                | 0.125410349                |
| Itgam        | -1.112091048                                                   | 0.005167292                | 0.125410349                |
| Tgfb1        | -1.495324759                                                   | 0.005415536                | 0.125410349                |
| C3           | -1.527041927                                                   | 0.005851162                | 0.125410349                |
| Ifna1        | -2.134444779                                                   | 0.005866586                | 0.125410349                |
| Fcgr3        | -0.879729201                                                   | 0.006578945                | 0.125791454                |
| Lilrb3       | -0.620066648                                                   | 0.007753704                | 0.125791454                |
| S100a8       | -1.394647517                                                   | 0.008238835                | 0.125791454                |
| Gp1bb        | -2.019247482                                                   | 0.008557237                | 0.125791454                |
| Ltf          | -1.411385292                                                   | 0.008899812                | 0.125791454                |
| Cxcr2        | -0.923296953                                                   | 0.009360019                | 0.125791454                |
| Marco        | -1.392051162                                                   | 0.00939018                 | 0.125791454                |
| Ccr2         | -0.871990139                                                   | 0.009493641                | 0.125791454                |
| Il1r2        | -1.555351507                                                   | 0.009843984                | 0.125791454                |
| Tnfrsf11a    | -0.959789075                                                   | 0.009863486                | 0.125791454                |
| Fcgr1g       | -0.656295019                                                   | 0.010276379                | 0.125791454                |
| Csf2rb       | -0.810367195                                                   | 0.010514295                | 0.125791454                |
| Cd163        | -1.193696033                                                   | 0.010924221                | 0.125791454                |
| Msr1         | -1.500936281                                                   | 0.011059879                | 0.125791454                |
| Vcam1        | -0.40894102                                                    | 0.012674716                | 0.131609076                |
| Camp         | -1.096191098                                                   | 0.012727221                | 0.131609076                |
| Tal1         | -0.936260041                                                   | 0.012861768                | 0.131609076                |
| Card9        | -1.087364008                                                   | 0.013037908                | 0.131609076                |
| C1s          | -1.626245667                                                   | 0.013562829                | 0.132851825                |
| Ccl24        | -1.606731565                                                   | 0.014851884                | 0.139402377                |
| Plau         | -1.620322841                                                   | 0.016183581                | 0.146749424                |
| Cd3d         | 2.696953252                                                    | 0.00130855                 | 0.113955908                |
| Ccl5         | 2.919351101                                                    | 0.001368791                | 0.113955908                |
| Gzma         | 3.229433189                                                    | 0.001463218                | 0.113955908                |
| Klra8        | 3.023951                                                       | 0.002604533                | 0.113955908                |

| <b>Genes</b> | <b>lfc (anti-PD-L1+IFN<math>\alpha</math>/IgG)</b> | <b>p_value</b> | <b>q_value</b> |
|--------------|----------------------------------------------------|----------------|----------------|
| Klrc1        | 3.901002432                                        | 0.002982024    | 0.113955908    |
| Klrd1        | 2.437499791                                        | 0.005508951    | 0.125410349    |
| Thy1         | 2.429916609                                        | 0.005672389    | 0.125410349    |
| Tcf7         | 2.266255948                                        | 0.006094709    | 0.125410349    |
| Cd3e         | 2.330146856                                        | 0.006967377    | 0.125791454    |
| Cd5          | 2.304539409                                        | 0.008273009    | 0.125791454    |
| Cd247        | 2.195327139                                        | 0.009332702    | 0.125791454    |
| Lck          | 2.153690508                                        | 0.009698326    | 0.125791454    |
| Cd6          | 2.304775351                                        | 0.010315762    | 0.125791454    |
| Lef1         | 2.475182117                                        | 0.010367818    | 0.125791454    |
| Il18r1       | 2.145856415                                        | 0.011080595    | 0.125791454    |
| Cd96         | 2.671973538                                        | 0.011285962    | 0.125791454    |
| Il7r         | 2.01294242                                         | 0.012799761    | 0.131609076    |
| Cd27         | 2.134725049                                        | 0.013657664    | 0.132851825    |
| Klra6        | 2.678621744                                        | 0.014852216    | 0.139402377    |
| Cd8a         | 2.285934115                                        | 0.016026351    | 0.146749424    |

<sup>a</sup> log fold change, lfc

<sup>b</sup> The 59 DE genes were sorted by directionality, p value and finally q value.

Negative lfc values signify genes downregulated and positive lfc denote genes upregulated in WT mice receiving weekly doses of anti-PDL1 + IFN $\alpha$ .

**Supplementary Table 3** Differentially expressed genes (N=39) detected among five different mouse groups

| <b>Gene symbol <sup>a</sup></b> | <b>p value</b> | <b>q value</b> |
|---------------------------------|----------------|----------------|
| Cd3d                            | 6.09E-05       | 0.012714478    |
| Fnl1                            | 7.13E-05       | 0.012714478    |
| Gzma                            | 6.39E-05       | 0.012714478    |
| Ccl5                            | 0.000137034    | 0.01466267     |
| Tcf7                            | 0.000127715    | 0.01466267     |
| Bst1                            | 0.000166592    | 0.014854425    |
| Thy1                            | 0.000195677    | 0.014955333    |
| Ifitm1                          | 0.000300345    | 0.02008555     |
| Cd3e                            | 0.00041132     | 0.020730016    |
| Clu                             | 0.000426225    | 0.020730016    |
| Lck                             | 0.00037148     | 0.020730016    |
| App                             | 0.00050175     | 0.021083641    |
| Cd14                            | 0.000534515    | 0.021083641    |
| Cd27                            | 0.000651301    | 0.021083641    |
| Cd5                             | 0.000657933    | 0.021083641    |
| Cd8a                            | 0.000669947    | 0.021083641    |
| Lef1                            | 0.000636758    | 0.021083641    |
| Card9                           | 0.001244526    | 0.022272704    |
| Ccr7                            | 0.001146936    | 0.022272704    |
| Cd247                           | 0.000885194    | 0.022272704    |
| Cd6                             | 0.001207783    | 0.022272704    |
| Csf2rb                          | 0.000927069    | 0.022272704    |
| Cxcr6                           | 0.00088062     | 0.022272704    |
| Fcgr3                           | 0.001332199    | 0.022272704    |
| Il1r2                           | 0.000823579    | 0.022272704    |
| Itgam                           | 0.001214113    | 0.022272704    |
| Lilrb3                          | 0.000979603    | 0.022272704    |
| Nfil3                           | 0.001303656    | 0.022272704    |
| Ppbp                            | 0.001128114    | 0.022272704    |
| Tfrc                            | 0.001297019    | 0.022272704    |
| Tgfbi                           | 0.000839307    | 0.022272704    |
| Trem1                           | 0.000999366    | 0.022272704    |
| Xcl1                            | 0.001416573    | 0.022965649    |
| Ccr2                            | 0.00152988     | 0.022984194    |
| Klrd1                           | 0.0015466      | 0.022984194    |
| Ltb4r1                          | 0.001505741    | 0.022984194    |
| Cxcr2                           | 0.00167012     | 0.023288167    |
| Fkbp5                           | 0.001697642    | 0.023288167    |
| Il27ra                          | 0.001653469    | 0.023288167    |

<sup>a</sup> These genes are identified as differentially expressed across any two or more of the five groups. ANOVA analysis ( $q < 0.025$ ) of Nanostring data from MUC1 Tg and WT treated biweekly with anti-PD-L1 or its isotype control IgG, and WT treated weekly with the combination of anti-PD-L1 and IFN $\alpha$ .

**Supplementary Table 4** Differentially expressed genes (n=136) in the comparison between mice responding to anti-PDL1 treatment (n=10) and the IgG controls (n=9)

| <b>Genes</b> | <b>lfc (responders / nonresponders)</b> | <b>p value</b> | <b>q value</b> |
|--------------|-----------------------------------------|----------------|----------------|
| Fn1          | -1.633597376                            | 2.29E-05       | 0.00311044     |
| Bst1         | -1.720804803                            | 4.63E-05       | 0.003545883    |
| Tfrc         | -0.934700853                            | 5.97E-05       | 0.003545883    |
| Ifitm1       | -1.42352384                             | 7.48E-05       | 0.003635979    |
| App          | -1.120001754                            | 8.69E-05       | 0.003875182    |
| Marco        | -1.353339233                            | 9.43E-05       | 0.003881124    |
| Il1r2        | -1.651691136                            | 0.000104144    | 0.003960829    |
| Card9        | -1.221501838                            | 0.000175832    | 0.00451726     |
| Cxcr2        | -1.116917529                            | 0.000179487    | 0.00451726     |
| Fkbp5        | -0.758333434                            | 0.000198298    | 0.00451726     |
| Csf2rb       | -0.786293233                            | 0.000200325    | 0.00451726     |
| Itgam        | -1.126210905                            | 0.000202643    | 0.00451726     |
| Tal1         | -1.08624491                             | 0.000252703    | 0.00519984     |
| Lilrb3       | -0.694030051                            | 0.000354238    | 0.006148735    |
| Icam4        | -1.048798439                            | 0.000377022    | 0.006148735    |
| Ltb4r1       | -1.473805421                            | 0.000396238    | 0.006148735    |
| Fcgr3        | -0.895773212                            | 0.000432595    | 0.006428839    |
| Ctsg         | -2.423136733                            | 0.000521177    | 0.006936193    |
| Abcb10       | -0.57344237                             | 0.000524139    | 0.006936193    |
| C3           | -1.353629259                            | 0.000564092    | 0.006936193    |
| Clec5a       | -1.680100509                            | 0.000570453    | 0.006936193    |
| Tgfb1        | -1.530870624                            | 0.000634221    | 0.007540185    |
| Tirap        | -0.459364265                            | 0.000779059    | 0.00903749     |
| Trem1        | -1.387295778                            | 0.000793948    | 0.00903749     |
| Fcer1g       | -0.566938698                            | 0.000869804    | 0.009306899    |
| Nfil3        | -0.863106543                            | 0.000971312    | 0.010103849    |
| Il13ra1      | -0.894372665                            | 0.001068766    | 0.01039618     |
| Tlr8         | -0.67835137                             | 0.001151401    | 0.010999994    |
| Ncam1        | -1.398849067                            | 0.001326161    | 0.012025362    |
| Ccr2         | -0.752068859                            | 0.001451488    | 0.012942439    |
| Hlx          | -0.750219483                            | 0.001502952    | 0.013181632    |
| Msr1         | -1.282763827                            | 0.001669227    | 0.013538975    |
| Ltf          | -1.300792049                            | 0.001897826    | 0.014643895    |
| Cd24a        | -0.210600406                            | 0.002006695    | 0.014909612    |
| Ltbr         | -0.926141096                            | 0.002034396    | 0.014909612    |
| Cd14         | -0.870036918                            | 0.002138714    | 0.01525616     |
| Ccl9         | -0.57479657                             | 0.002203995    | 0.015331417    |

| <b>Genes</b> | <b>lfc (responders / nonresponders)</b> | <b>p value</b> | <b>q value</b> |
|--------------|-----------------------------------------|----------------|----------------|
| Litaf        | -0.573303889                            | 0.002206578    | 0.015331417    |
| Il18rap      | -0.302037128                            | 0.002553898    | 0.016868339    |
| Cfh          | -0.96469238                             | 0.002832706    | 0.018090464    |
| Ppbp         | -1.237932985                            | 0.002840372    | 0.018090464    |
| Csf3r        | -0.404967226                            | 0.004125321    | 0.024171209    |
| Plaur        | -0.056982023                            | 0.004159708    | 0.024171209    |
| Vcam1        | -0.251598956                            | 0.004201724    | 0.024171209    |
| Cebpb        | -0.44922141                             | 0.004336121    | 0.024370271    |
| Ceacam1      | -0.334923271                            | 0.004388288    | 0.024370271    |
| Fcgr1        | -0.939621636                            | 0.004524554    | 0.024700372    |
| S100a9       | -1.292483543                            | 0.005365715    | 0.028143702    |
| Plau         | -0.965849691                            | 0.005532064    | 0.028470091    |
| Ncf4         | -0.149958926                            | 0.005635538    | 0.028714407    |
| Clu          | -0.850461238                            | 0.005960303    | 0.029801515    |
| Socs3        | -0.30811639                             | 0.006195036    | 0.030688372    |
| Lilrb4       | -0.541717282                            | 0.006906258    | 0.032410947    |
| Cfp          | -0.119654328                            | 0.007422072    | 0.034231107    |
| S100a8       | -1.191400029                            | 0.007611608    | 0.034805217    |
| Cd44         | -0.058787899                            | 0.008524611    | 0.037661623    |
| Cd34         | -1.358898868                            | 0.0085388      | 0.037661623    |
| Myd88        | -0.041802181                            | 0.010222151    | 0.043061817    |
| Cybb         | -0.153310516                            | 0.011075452    | 0.045309413    |
| Cdkn1a       | -0.527818433                            | 0.011088903    | 0.045309413    |
| Clec4e       | -1.196071038                            | 0.011094454    | 0.045309413    |
| Traf4        | -0.218220057                            | 0.011268988    | 0.045673548    |
| Prim1        | -0.043325451                            | 0.011912984    | 0.04687732     |
| Cd3d         | 2.300977291                             | 7.42E-06       | 0.00311044     |
| Ccl5         | 2.399412577                             | 1.45E-05       | 0.00311044     |
| Gzma         | 2.87745796                              | 2.33E-05       | 0.00311044     |
| Tcf7         | 2.10979181                              | 3.59E-05       | 0.003545883    |
| Cd3e         | 2.034996587                             | 5.03E-05       | 0.003545883    |
| Lck          | 1.886968372                             | 5.80E-05       | 0.003545883    |
| Thy1         | 2.138996454                             | 7.24E-05       | 0.003635979    |
| Cd5          | 1.905530553                             | 0.000111051    | 0.003960829    |
| Cd27         | 1.829387324                             | 0.000126201    | 0.004219834    |
| Ccr7         | 1.875437555                             | 0.000139152    | 0.00437921     |
| Cd6          | 1.917539518                             | 0.000161029    | 0.00451726     |
| Cd247        | 1.84292355                              | 0.000173673    | 0.00451726     |
| Cxcr6        | 3.276546946                             | 0.000240114    | 0.005138441    |
| Cd8a         | 2.099597124                             | 0.000286096    | 0.005668938    |

| <b>Genes</b> | <b>lfc <sup>a</sup> (responders / nonresponders)</b> | <b>p <sup>b</sup> value</b> | <b>q <sup>b</sup> value</b> |
|--------------|------------------------------------------------------|-----------------------------|-----------------------------|
| Il27ra       | 1.646140986                                          | 0.000344809                 | 0.006148735                 |
| Klrd1        | 1.94718769                                           | 0.000352082                 | 0.006148735                 |
| Lef1         | 2.190682841                                          | 0.000356849                 | 0.006148735                 |
| Cd2          | 1.499317129                                          | 0.000396597                 | 0.006148735                 |
| Klra8        | 2.049129447                                          | 0.000402254                 | 0.006148735                 |
| Icos         | 1.773177536                                          | 0.000468748                 | 0.006777838                 |
| Cd83         | 1.425266976                                          | 0.000519465                 | 0.006936193                 |
| Sh2d1a       | 2.856469774                                          | 0.000532228                 | 0.006936193                 |
| Cd79b        | 1.583619478                                          | 0.000568545                 | 0.006936193                 |
| Xcl1         | 1.637102578                                          | 0.000842394                 | 0.009306899                 |
| Il2rb        | 1.500763573                                          | 0.000863525                 | 0.009306899                 |
| Cd8b1        | 3.682614766                                          | 0.000982056                 | 0.010103849                 |
| Cd4          | 1.466288906                                          | 0.001007106                 | 0.010166073                 |
| Klrc1        | 2.409938623                                          | 0.001030218                 | 0.01020679                  |
| Tnfrsf13c    | 1.639478892                                          | 0.001228424                 | 0.011529947                 |
| Cd40         | 1.422377254                                          | 0.001301686                 | 0.012006933                 |
| Btla         | 1.26104543                                           | 0.001571831                 | 0.013538975                 |
| Fyn          | 1.27673031                                           | 0.001624588                 | 0.013538975                 |
| Nt5e         | 1.584747668                                          | 0.001668785                 | 0.013538975                 |
| Il18r1       | 1.531671298                                          | 0.001670229                 | 0.013538975                 |
| Cd226        | 1.524836696                                          | 0.001761894                 | 0.014068858                 |
| Ms4a1        | 1.496411271                                          | 0.001886788                 | 0.014643895                 |
| Ltb          | 1.333790962                                          | 0.001916024                 | 0.014643895                 |
| Cd55         | 1.328497896                                          | 0.001978955                 | 0.014909612                 |
| Prfl         | 2.519153498                                          | 0.002113591                 | 0.01525616                  |
| Il7r         | 1.430622698                                          | 0.002399344                 | 0.016439608                 |
| Pml          | 1.27663676                                           | 0.002427531                 | 0.016439608                 |
| H2-Ob        | 1.280490525                                          | 0.002552668                 | 0.016868339                 |
| Klrk1        | 2.394933286                                          | 0.00260554                  | 0.016999557                 |
| Il2rg        | 1.252660909                                          | 0.002995442                 | 0.018707282                 |
| Ccr6         | 1.330072751                                          | 0.003037445                 | 0.018707282                 |
| Cxcr3        | 1.585420386                                          | 0.003042119                 | 0.018707282                 |
| Traf5        | 1.334703008                                          | 0.003158118                 | 0.019133904                 |
| Ets1         | 1.250104557                                          | 0.003183023                 | 0.019133904                 |
| Eomes        | 1.918934544                                          | 0.003536266                 | 0.021021135                 |
| Il4          | 1.341746349                                          | 0.004353672                 | 0.024370271                 |
| H2-DMb2      | 1.308445619                                          | 0.004418535                 | 0.024370271                 |
| Klra4        | 3.259649457                                          | 0.004625813                 | 0.024998081                 |
| Ikzf2        | 1.563490156                                          | 0.004908767                 | 0.026261903                 |
| Folr4        | 2.40443577                                           | 0.0051026                   | 0.027028625                 |



| <b>Genes</b> | <b>lfc (responders / nonresponders)</b> | <b>p value</b> | <b>q value</b> |
|--------------|-----------------------------------------|----------------|----------------|
| Cxcr5        | 1.438453768                             | 0.005534373    | 0.028470091    |
| Foxp3        | 1.519557916                             | 0.005822857    | 0.029388946    |
| Il21r        | 1.221089921                             | 0.006331539    | 0.031076821    |
| Relb         | 1.184755987                             | 0.006449952    | 0.031370219    |
| Ctla4        | 1.426917576                             | 0.006579542    | 0.031673278    |
| Ly86         | 1.178024777                             | 0.006630668    | 0.031673278    |
| Tnfrsf9      | 2.469361939                             | 0.006776018    | 0.032081145    |
| Tagap        | 1.212651858                             | 0.007267605    | 0.033810162    |
| H2-DMa       | 1.168465022                             | 0.007743029    | 0.035106107    |
| H2-Aa        | 1.300928535                             | 0.008469205    | 0.037661623    |
| Cd79a        | 1.518408195                             | 0.00859035     | 0.037661623    |
| Tnfrsf4      | 2.189244352                             | 0.008658654    | 0.037661623    |
| Pecam1       | 1.130200822                             | 0.008895125    | 0.038378161    |
| Cd40lg       | 1.630038611                             | 0.009127723    | 0.039066653    |
| Stat4        | 1.301334644                             | 0.009799318    | 0.041608217    |
| Il17rb       | 0.986308773                             | 0.010426031    | 0.043577551    |
| Blnk         | 1.168468831                             | 0.011370032    | 0.045736595    |
| Cd1d1        | 1.278766914                             | 0.011765974    | 0.04687732     |
| Ccr9         | 1.632088648                             | 0.011916478    | 0.04687732     |

<sup>a</sup> log fold change, lfc

<sup>b</sup> The 136 DE genes were sorted by directionality, p value and finally q value.

Negative lfc values signify genes downregulated and positive lfc denote genes upregulated in responder mice (includes M-tg receiving bi-weekly doses of anti-PDL1 and WT mice receiving weekly doses of anti-PDL1+ IFN $\alpha$ ) compared to rat IgG control treated M-Tg and WT mice and non-responding WT mice treated with biweekly anti-PD-L1 antibody.

## Supplementary Figure 1

MUC1 .Tg mice

### A Total T cells

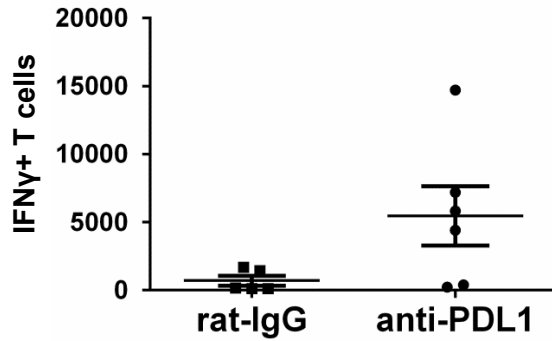

### B CD4+ T cells

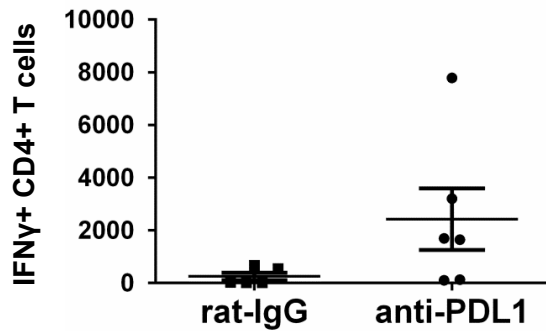

### C CD8+ T cells

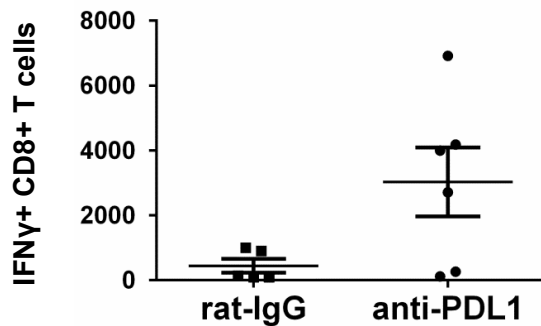

**Supplementary Figure 1** Intracellular IFN $\gamma$  production by CD3 + (A), CD4+ (B) and CD8+ T cells (C) in splenocytes from MUC1.Tg mice treated IP with 200  $\mu$ g anti-PD-L1 or control rat IgG, every two weeks, for a total of 3 doses, starting at day 21..

Supplementary Figure 2

Foxp3

Control IgG

Anti-PD-L1

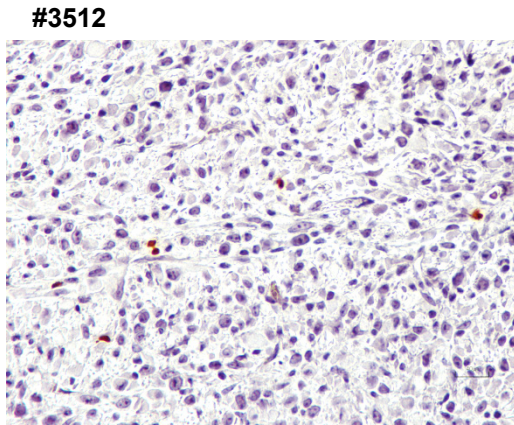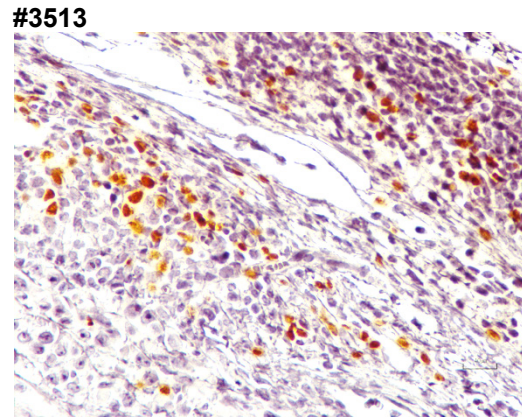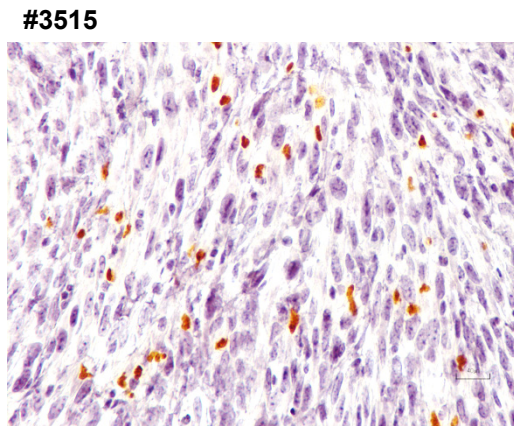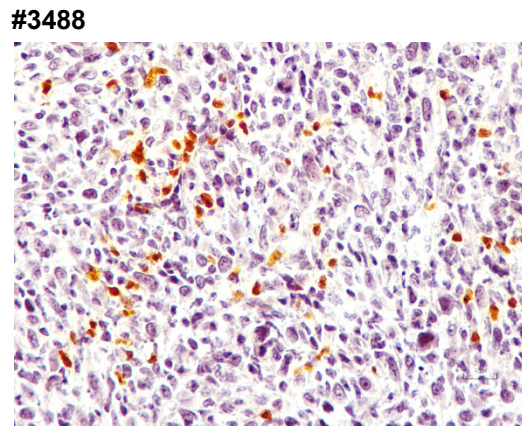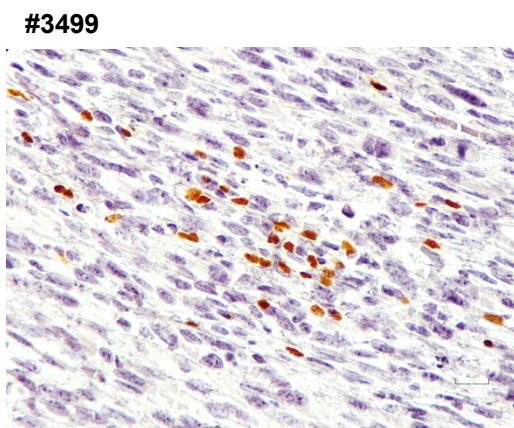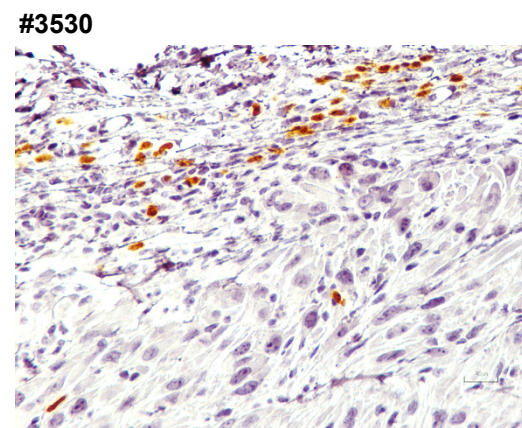

**Supplementary Figure 2.** Foxp3 expression by IHC, in tumors from anti-PD-L1-treated (right column) and control IgG-treated mice (left column). Tumors from six different mice, three representative from each group, are shown.

### Supplementary Figure 3

**A**

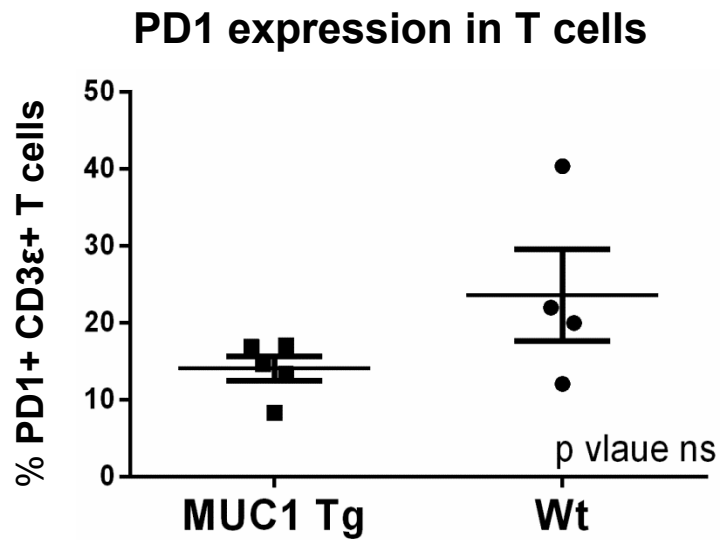

**B**

### PD-L1 expression in 2F8 tumors

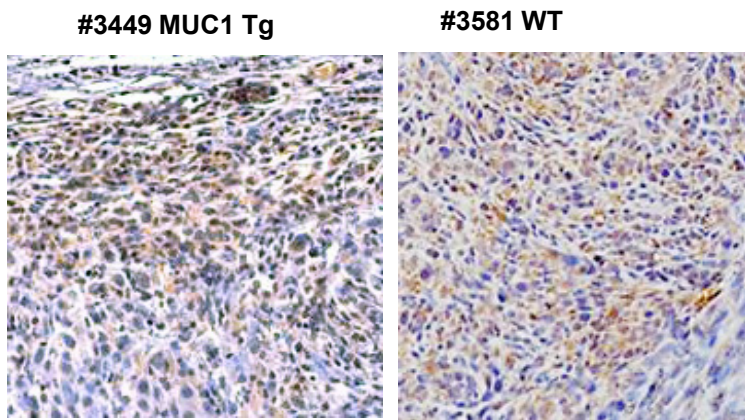

**Supplementary Figure 3.** A Flow cytometry of cell surface PD-1 expression by splenic T cells from MUC1Tg (n=5) and wild type (Wt, n=4) mice (ns; not significant). B Tumor PD-L1 expression by IHC in tumors from MUC1.Tg and WT mice. Representative tumors are shown.

## Supplementary Figure 4

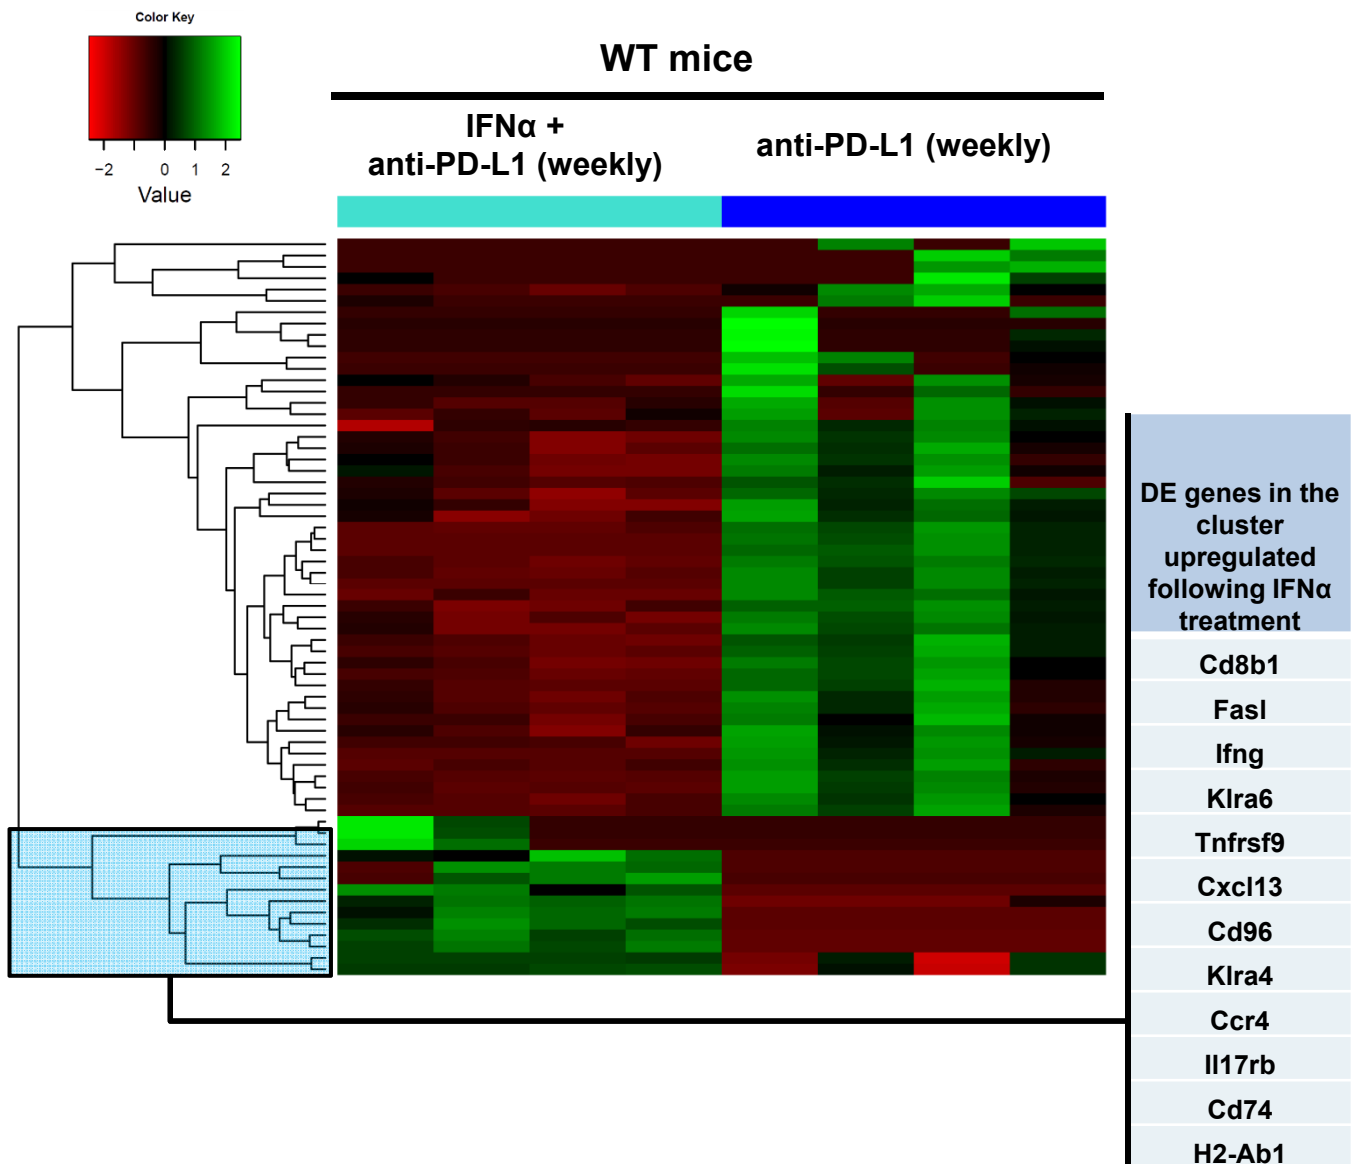

**Supplementary Figure 4.** Heat map of top 65 DE genes ( $p < 0.05$ ; included in  $n = 136$  genes listed in Supplementary Table 4) from the comparison of WT mice receiving weekly doses of anti-PD-L1 plus IFN $\alpha$  ( $n = 4$ ) versus WT mice treated weekly with anti-PD-L1 ( $n = 4$ ). The DE gene cluster upregulated in IFN $\alpha$ -treated mice (blue highlighted box) is listed in the right table inset.

## Supplementary Figure 5

**A**

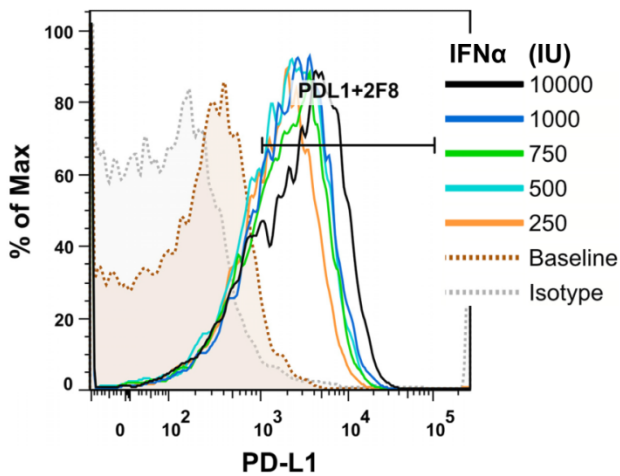

**PD-L1 expression in 2F8 cells stimulated with IFN $\alpha$**

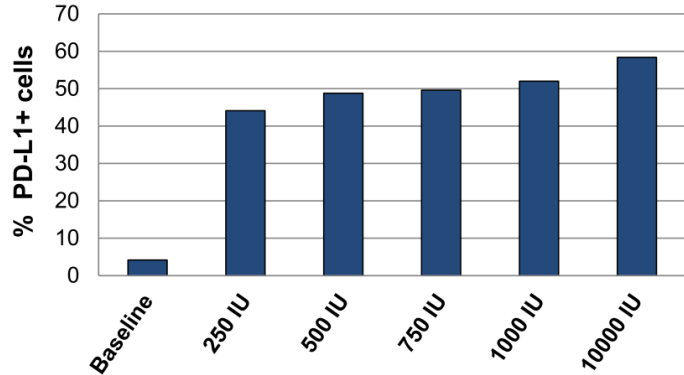

**B**

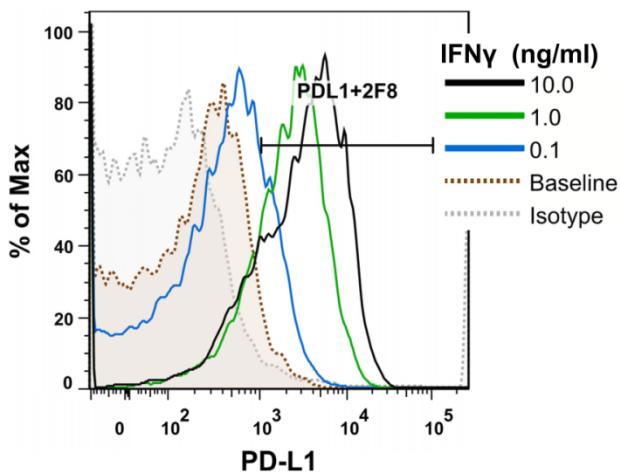

**PD-L1 expression in 2F8 cells stimulated with IFN $\gamma$**

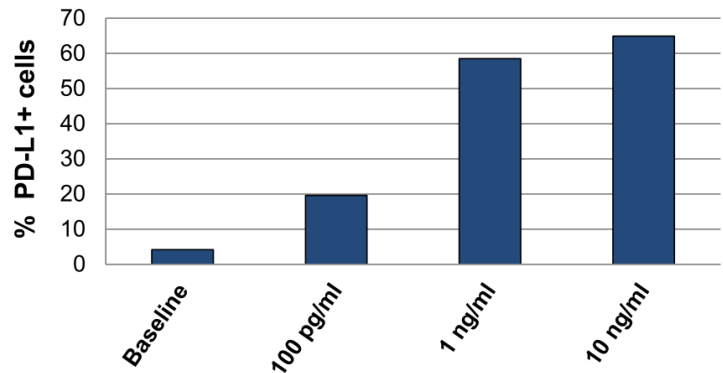

**Supplementary Figure 5.** Tumor PD-L1 by flow cytometry in response to stimulation with IFN $\alpha$  and IFN $\gamma$ . A 2F8 cells were cultured for 24 h in the presence of varying concentrations of IFN $\alpha$  (250, 500, 750, 1000 and 10,000 IU/ml;). B IFN $\gamma$  was used at 10, 1.0, 0.1 ng/ml. Isotype control (grey tint) and baseline unstimulated control cells (orange tint), cultured for 24 h, were used for gating. Percentages of PD-L1 positive cells by flow cytometry are shown in the bar graphs at right.
